# Supplementary material for: Altered lipoproteins in patients with systemic lupus erythematosus are associated with augmented oxidative stress: a potential role in atherosclerosis
Source: Springer Nature journal article supplement (doi:10.1186/s13075-016-1204-x), 2016-12-01

Supplementary material for the manuscript

**Altered lipoproteins in patients with systemic lupus erythematosus are associated with augmented oxidative stress: a potential role in atherosclerosis**

Jin Kyun Park, Jae-Yong Kim, Jin Young Moon, Eun Young Ahn, Eun Young Lee, Eun Bong Lee, Kyung-Hyun Cho, Yeong Wook Song.

**Corresponding author: Yeong Wook Song, MD, PhD**

Division of Rheumatology, Department of Internal Medicine, Seoul National University College of Medicine; 101 Daehak-ro, Jongno-gu, Seoul 03080, South Korea.

E-mail: [ysong@snu.ac.kr](mailto:ysong@snu.ac.kr); Phone: 822-2072-2234; FAX: 822-762-9662.

**Supplementary table 1: Demographic and baseline clinical characteristics of the participants included in the pooled samples.**

|                                                                      | <b>SLE<br/>(n = 19)</b> | <b>HC<br/>(n = 8)</b> | <b>p-value</b> |
|----------------------------------------------------------------------|-------------------------|-----------------------|----------------|
| Age, years, mean $\pm$ SD                                            | 46.0 $\pm$ 12.2         | 41.7 $\pm$ 11.2       | 0.406          |
| Female, n (%)                                                        | 18 (94.7)               | 6 (75.0)              | 0.201          |
| Height, cm*                                                          | 158.3 $\pm$ 7.4         | 161.3 $\pm$ 6.7       | 0.338          |
| Weight, kg*                                                          | 53.1 $\pm$ 9.9          | 56 $\pm$ 7.8          | 0.433          |
| Body mass index, kg/m <sup>2</sup> *                                 | 21.2 $\pm$ 3.1          | 21.5 $\pm$ 2.3        | 0.764          |
| Smoking, n (%)                                                       | 1 (5.6)                 | 0 (0)                 | 1.000          |
| Alcohol, n (%)                                                       | 0 (0)                   | 0 (0)                 | 1.000          |
| Diabetes, n (%)                                                      | 1 (5.6)                 | 0 (0)                 | 1.000          |
| Hypertension, n (%)                                                  | 6 (31.6)                | 0 (0)                 | 0.136          |
| Dyslipidemia, n (%)                                                  | 1 (5.6)                 | 0 (0)                 | 1.000          |
| SLE duration, years                                                  | 14.6 $\pm$ 7.2          |                       |                |
| ESR, mm/hour                                                         | 32.1 $\pm$ 26.0         |                       |                |
| SLEDAI-2K                                                            | 3.6 $\pm$ 2.0           |                       |                |
| C3 (mg/dL)                                                           | 71.5 $\pm$ 16.5         |                       |                |
| C4 (mg/dL)                                                           | 10.7 $\pm$ 4.8          |                       |                |
| Treatment, n (%)                                                     |                         |                       |                |
| Corticosteroids                                                      | 19 (100)                | 0 (0)                 |                |
| Corticosteroid dose (prednisolone equivalent), mg/day, mean $\pm$ SD | 6.3 $\pm$ 4.0           | 0                     |                |
| Hydroxychloroquine                                                   | 16 (84.2)               | 0 (0)                 |                |
| Methotrexate                                                         | 1 (5.3)                 | 0 (0)                 |                |
| Statins                                                              | 1 (5.3)                 | 0 (0)                 |                |
| ACE inhibitors                                                       | 2 (10.5)                | 0 (0)                 |                |
| ARB                                                                  | 2 (10.5)                | 0 (0)                 |                |
| Aspirin                                                              | 0 (0)                   | 0 (0)                 |                |

\*available for 18 of 19 patients. ACE, angiotensin converting enzyme; ARB, angiotensin receptor blocker; ESR, erythrocyte sedimentation rate; SLE, systemic lupus erythematosus; SLEDAI-2K, SLE disease activity index 2000.

**Supplementary figure 1: Age distribution of 19 systemic lupus erythematosus (SLE) patients and 8 healthy controls (HCs) included in the pooled samples.** The median ages (minimum-maximum) of SLE patients and HCs were 47 (25-67) years and 41 (31 – 64) years, respectively. The age did not differ between them (mean  $\pm$  SD: 46.0  $\pm$  12.2 years vs. 43.1  $\pm$  4.1 years,  $p = 0.57$ ).

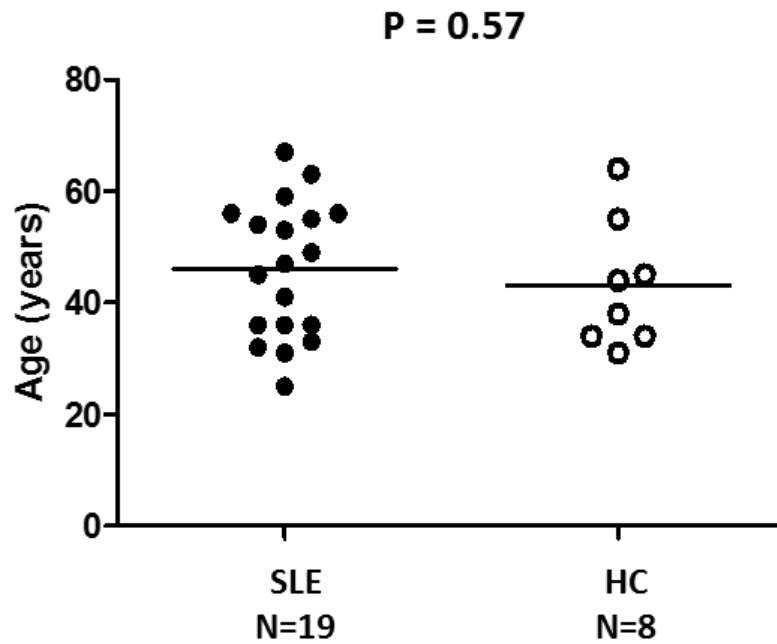

Supplement: MOESM1 [file 11966724]
